# Supplementary material for: Stratospheric δ 13 CO 2 observed over Japan and its governing processes and potential as an air age tracer
Source: Copernicus journal article supplement (doi:10.5194/egusphere-2025-1003), 2025-04-04
Supplement: Supplementary file [file egusphere-2025-1003-AC2-supplement.pdf]

## Responses to the Referee #2 Comments

Thank you very much for your significant and useful comments on the paper “Stratospheric  $\delta^{13}\text{CO}_2$  observed over Japan and its governing processes and potential as an air age tracer” by Sugawara et al. We have revised the manuscript, considering your comments and suggestions. Details of our revision are as follows. The line numbers denote those of the revised manuscript.

*This paper uses flask sample measurements from balloon flights in the stratosphere over Japan to investigate the stable carbon isotopic ratio of  $\text{CO}_2$  and other molecules involved in  $\text{CO}_2$  photochemistry in the stratosphere. The measurements and analytical methods are described in some detail and as far as I could follow it the techniques seemed reasonable, but I am not an expert in this topic as the authors clearly are. The discussions of the mechanisms responsible for the  $\delta^{13}\text{CO}_2$  and  $\text{CO}_2$  stratospheric profiles are well done and the schematic shown in Figure 6 provides a nice summary of the competing processes. The 2D modeling is interesting in general and provides some support for the mechanisms described here as the primary drivers of the observed distributions. The model transport is inaccurate, as the authors attest, but that is a common limitation of most stratospheric models.*

*The use of  $\delta^{13}\text{C}_\text{P}$  as an age of air tracer is somewhat dubious. The large uncertainties on the ages with this quantity make it essentially unusable on its own. The authors do suggest that it could be used in combination with other trace gas measurements for multi-component age estimates but it seems unlikely that this new quantity will help constrain any of the current age of air trace gas estimates. My main suggestion would be to considerably shorten Section 3.5 by removing much of the detail of the age of air calculation with  $\delta^{13}\text{C}_\text{P}$ .*

We have deleted the descriptions about usefulness of  $\delta^{13}\text{C}_\text{P}$  as an age tracer throughout the paper and clearly stated that the  $\delta^{13}\text{C}_\text{P}$  age has large uncertainties and it cannot be used to improve mean age observations at present in Conclusions. Along with this, we have changed the manuscript title to “Stratospheric  $\delta^{13}\text{CO}_2$  observed over Japan and its governing processes” by removing “potential as an air age tracer”. The related changes are as follows.

Lines 27-30: The sentences in Abstract “used it to estimate the mean age of stratospheric air. Despite large uncertainties, the mean age derived from  $\delta^{13}\text{C}_\text{P}$  was consistent with that derived from the  $\text{CO}_2$  mole fraction, suggesting its usefulness for further investigation of stratospheric transport processes” have been replaced with “we found that  $\delta^{13}\text{C}_\text{P}$  in the mid-latitude mid-stratosphere decreases over time

*with an about 5-year lag relative to the tropical upper troposphere. This fact strongly supports that stratospheric  $\delta^{13}\text{CO}_2$  variations are governed by the airborne production of  $^{13}\text{C}$ -depleted  $\text{CO}_2$  by  $\text{CH}_4$  oxidation, the gravitational separation, and the propagation of the decreasing tropospheric  $\delta^{13}\text{CO}_2$  trend into the stratosphere”*

Lines 505-524: We have removed many sentences about  $\delta^{13}\text{C}_\text{P}$  age in Section 3.5 and moved the minimum necessary descriptions to Appendix C. We have deleted sentence “*However, the result that  $\delta^{13}\text{C}_\text{P}$  age and  $\text{CO}_2$  age are roughly consistent implies that  $\delta^{13}\text{C}_\text{P}$  age could be used in addition to  $\text{SF}_6$ , halocarbons, etc., for better multi-component age estimations (Umezawa et al., 2024).*” and add “*At present, the  $\delta^{13}\text{C}_\text{P}$  age is subject to larger uncertainties, making unsuitable for use as an additional constraint for age estimation. However, considering that the average  $\delta^{13}\text{C}_\text{P}$  age was estimated to be  $5.5 \pm 1.6$  years, the concept of stratospheric  $\delta^{13}\text{C}_\text{P}$  itself would be valid.*”.

Lines 539-541: We have deleted sentence in Conclusions “*our results showed that stratospheric  $\delta^{13}\text{C}_\text{P}$  can serve as an additional age tracer alongside  $\text{CO}_2$  and  $\text{SF}_6$  mole fractions, and it should prove a useful tool for investigating stratospheric transport processes*” and add “*Because the  $\delta^{13}\text{C}_\text{P}$  age has larger uncertainties than the  $\text{CO}_2$  age at present, it is difficult to refine the mean age estimation. However,  $\delta^{13}\text{C}_\text{P}$  in the mid-latitude mid-stratosphere decreased over time with a time delay and it was found to be quasi-conservative in the stratosphere.*”.

Lines 644-717: The title of Appendix C has been changed to “*Age calculation*” and totally rearranged descriptions following suggestions by RC1. Details of  $\delta^{13}\text{C}_\text{P}$  age calculation have been partly moved from Sect. 3.5 to Appendix C. Accordingly, the order of the figures C1 – C4 has been changed.

*Overall, this paper presents novel measurements and analysis suitable for publication in ACP. I recommend publication with consideration of the main comment above and the specific comments below.*

*Specific comments:*

*Line 18: add ‘the’ after ‘investigate’*

As described above, we revised the abstract and removed a sentence “*and to investigate the usefulness of  $\delta^{13}\text{CO}_2$  as an age tracer,*”.

*Line 45: For those of us not as familiar with the details of isotopic studies, perhaps a brief explanation of MIE would be helpful here.*

Lines 47-50: We added sentences as follows:

*“The isotopic fractionation is usually caused by the effect of mass differences between isotopologues (i.e. the mass-dependent isotopic effect). In this case, the fractionation between  $^{18}\text{O}$  and  $^{16}\text{O}$  is almost twice as large as that between  $^{17}\text{O}$  and  $^{16}\text{O}$ . However, the isotopic fractionation that does not follow this relation occurs mainly in photochemical processes.”*

*Figure 2c: Appear to be missing the dotted line in this figure that would show the model results without the tropospheric trend, GS or airborne sources.*

Figure 2c: The dotted line has been changed to a thicker dotted line to make it easier to see. Because that line shows a result without the tropospheric trend, GS or airborne sources, the vertical distribution becomes constant. Figure caption has been revised as follows:

*“Curves show 2-D modeling results without the tropospheric trend, seasonal cycle, GS, or airborne sources (thick dotted line), ...”*

*Lines 380-5: The GS correction of CO<sub>2</sub> is interesting, although not as significant as for  $\delta^{13}\text{C}$  as is mentioned. The example of 22 August 2010 is said to have a GS correction of 0.4 ppm for CO<sub>2</sub> at the 34 km altitude level but it doesn't look that large in Fig. 5a. Certainly, all of the points below the 34 km level have very small GS corrections for CO<sub>2</sub>. But 0.4-0.6 ppm would have an effect on the age of air calculation with CO<sub>2</sub>. Would you recommend that all age of air calculations with CO<sub>2</sub> use a GS correction? If so, would an average profile of  $\delta^{13}\text{C}$  as in Fig. A1 be appropriate to use in Eqn. 8? The implication here is that age of air from CO<sub>2</sub> without taking into account GS, which is essentially all age of air calculations done thus far, has an old age bias that increases with height. If this bias is quite small, say less than a month, then this is not significant. But it appears to be larger than that at high altitudes. A brief statement here about age of air implications would be useful.*

As you pointed out, we recommend that GS corrections will be applied not only for  $\delta^{13}\text{C}$  but also for CO<sub>2</sub> mole fraction in order to estimate the mean ages more precisely. Our CO<sub>2</sub> age was calculated with taking into account GS, as described in Appendix C.

Lines 390-393: As you suggested, we added some sentences as follows:

*“In this regard, the mean age estimated from the CO<sub>2</sub> mole fraction without GS correction has an older age*

*bias that increases with increasing altitude. The age bias is negligibly small (< 1 month) in the lower stratosphere but not negligible in the mid-stratosphere (> 2 months at 35 km altitude). Therefore, we applied the GS correction to the CO<sub>2</sub> mole fraction to estimate the CO<sub>2</sub> age, as described in Appendix C.”*

*Figure 10: I would suggest removing the trend line for the delta13Cp age since the uncertainty on the values are large and the trend is not significant. The insignificance of the trend is mentioned in the text but the figure implies there is a discrepancy in the age trends rather than that they are in agreement within uncertainties.*

Figure 10: We removed the trend line for  $\delta^{13}\text{C}_p$  age, as you suggested. Figure caption has been corrected to “Dashed line is a linear least-squares fit to the CO<sub>2</sub> ages. The linear fit to the  $\delta^{13}\text{C}_p$  age is not shown because the trend is not significant.”

*Line 598: add ‘is’ before ‘important’*

Line 584: We corrected it. Thank you.

Other revisions

Fig. 3

Because NOAA GML and INSTAAR have kindly provided us with updated  $\delta^{13}\text{C}$  data at MLO in addition to well-organized data repository (Michel et al., 2025), we have replaced Fig.3 and replaced references. This change does not affect our results. Accordingly, the old organization name “ESRL” in NOAA was changed to the new name “GML”.
